# Supplementary material for: Spatial‐temporal distribution, photoreactivity and environmental control of dissolved organic matter in the sea-surface microlayer of the eastern marginal seas of China
Source: Copernicus journal article supplement (doi:10.5194/bg-2022-140), 2022-07-14
Supplement: Supplementary file [file bg-2022-140-CC2-supplement.zip]

## Supplementary Figures and Tables

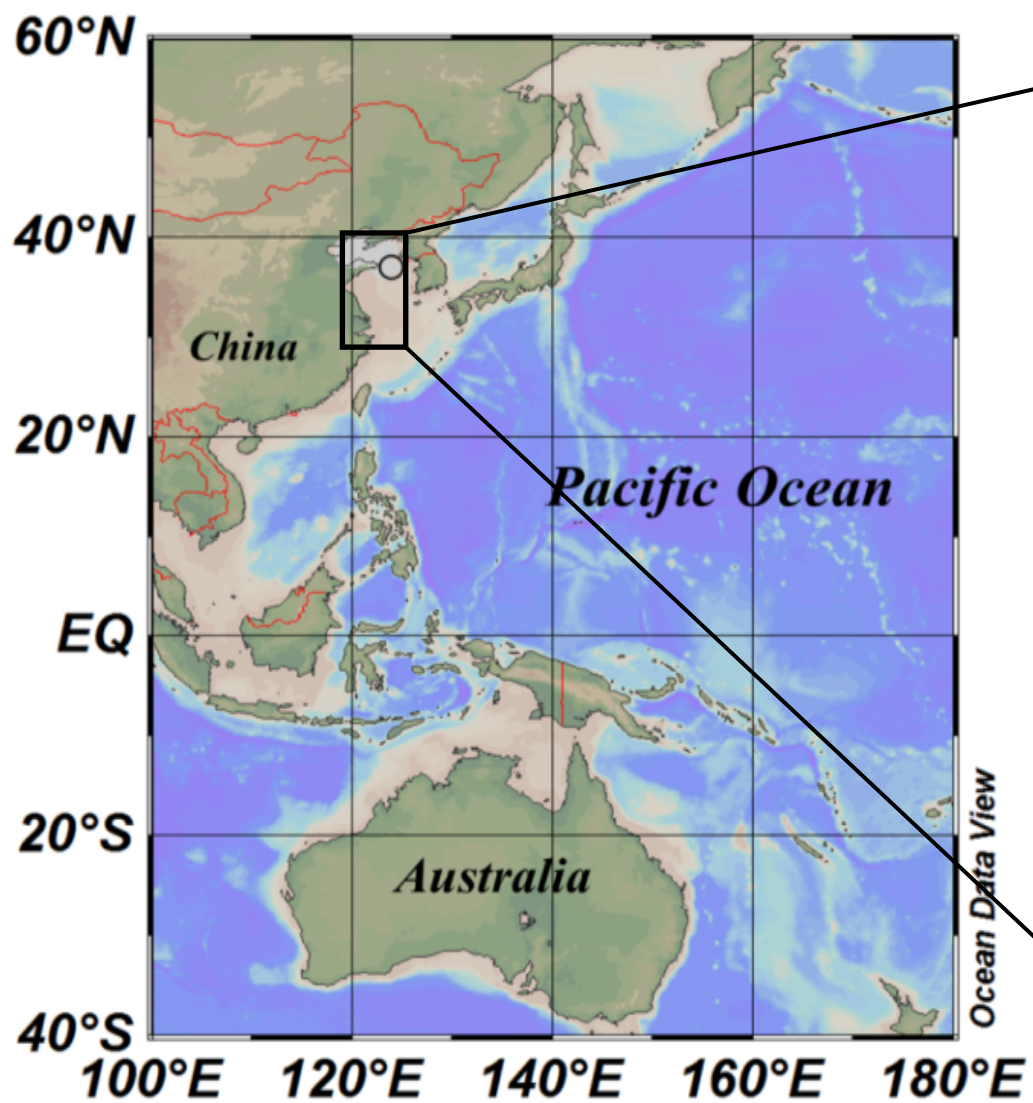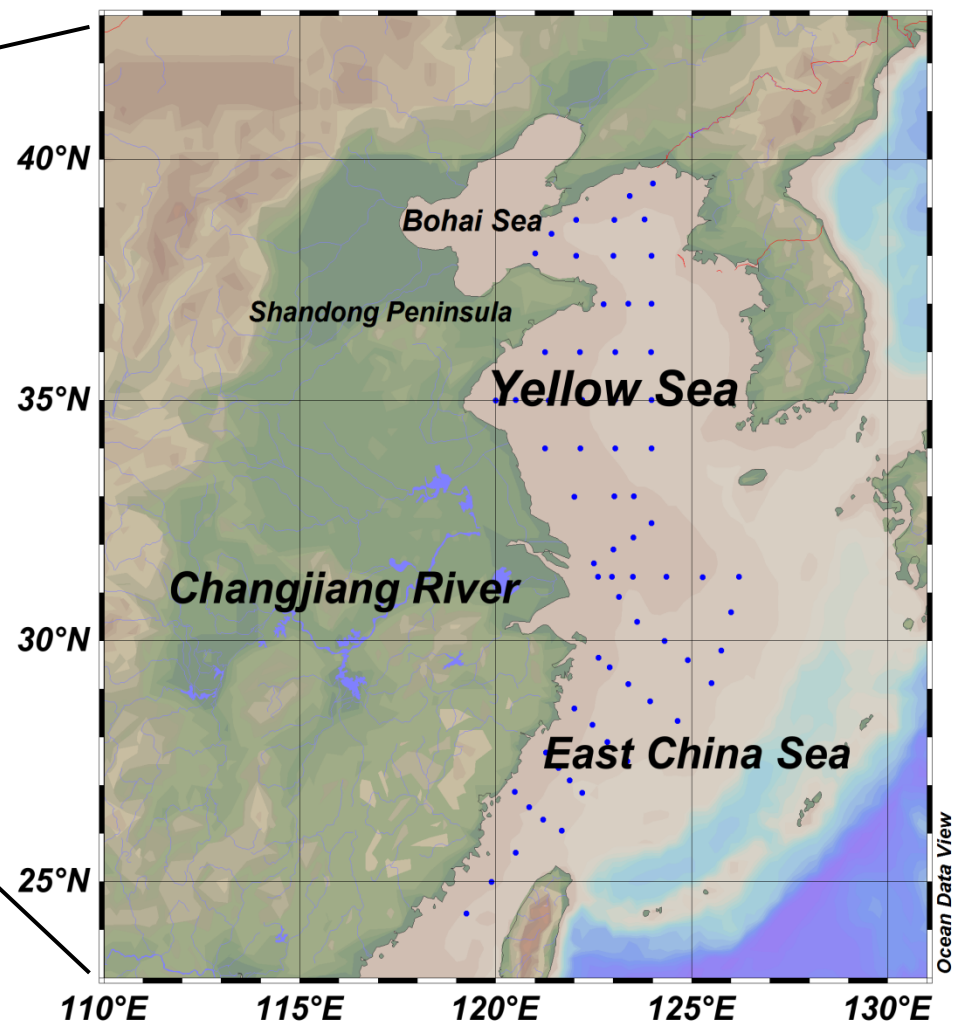

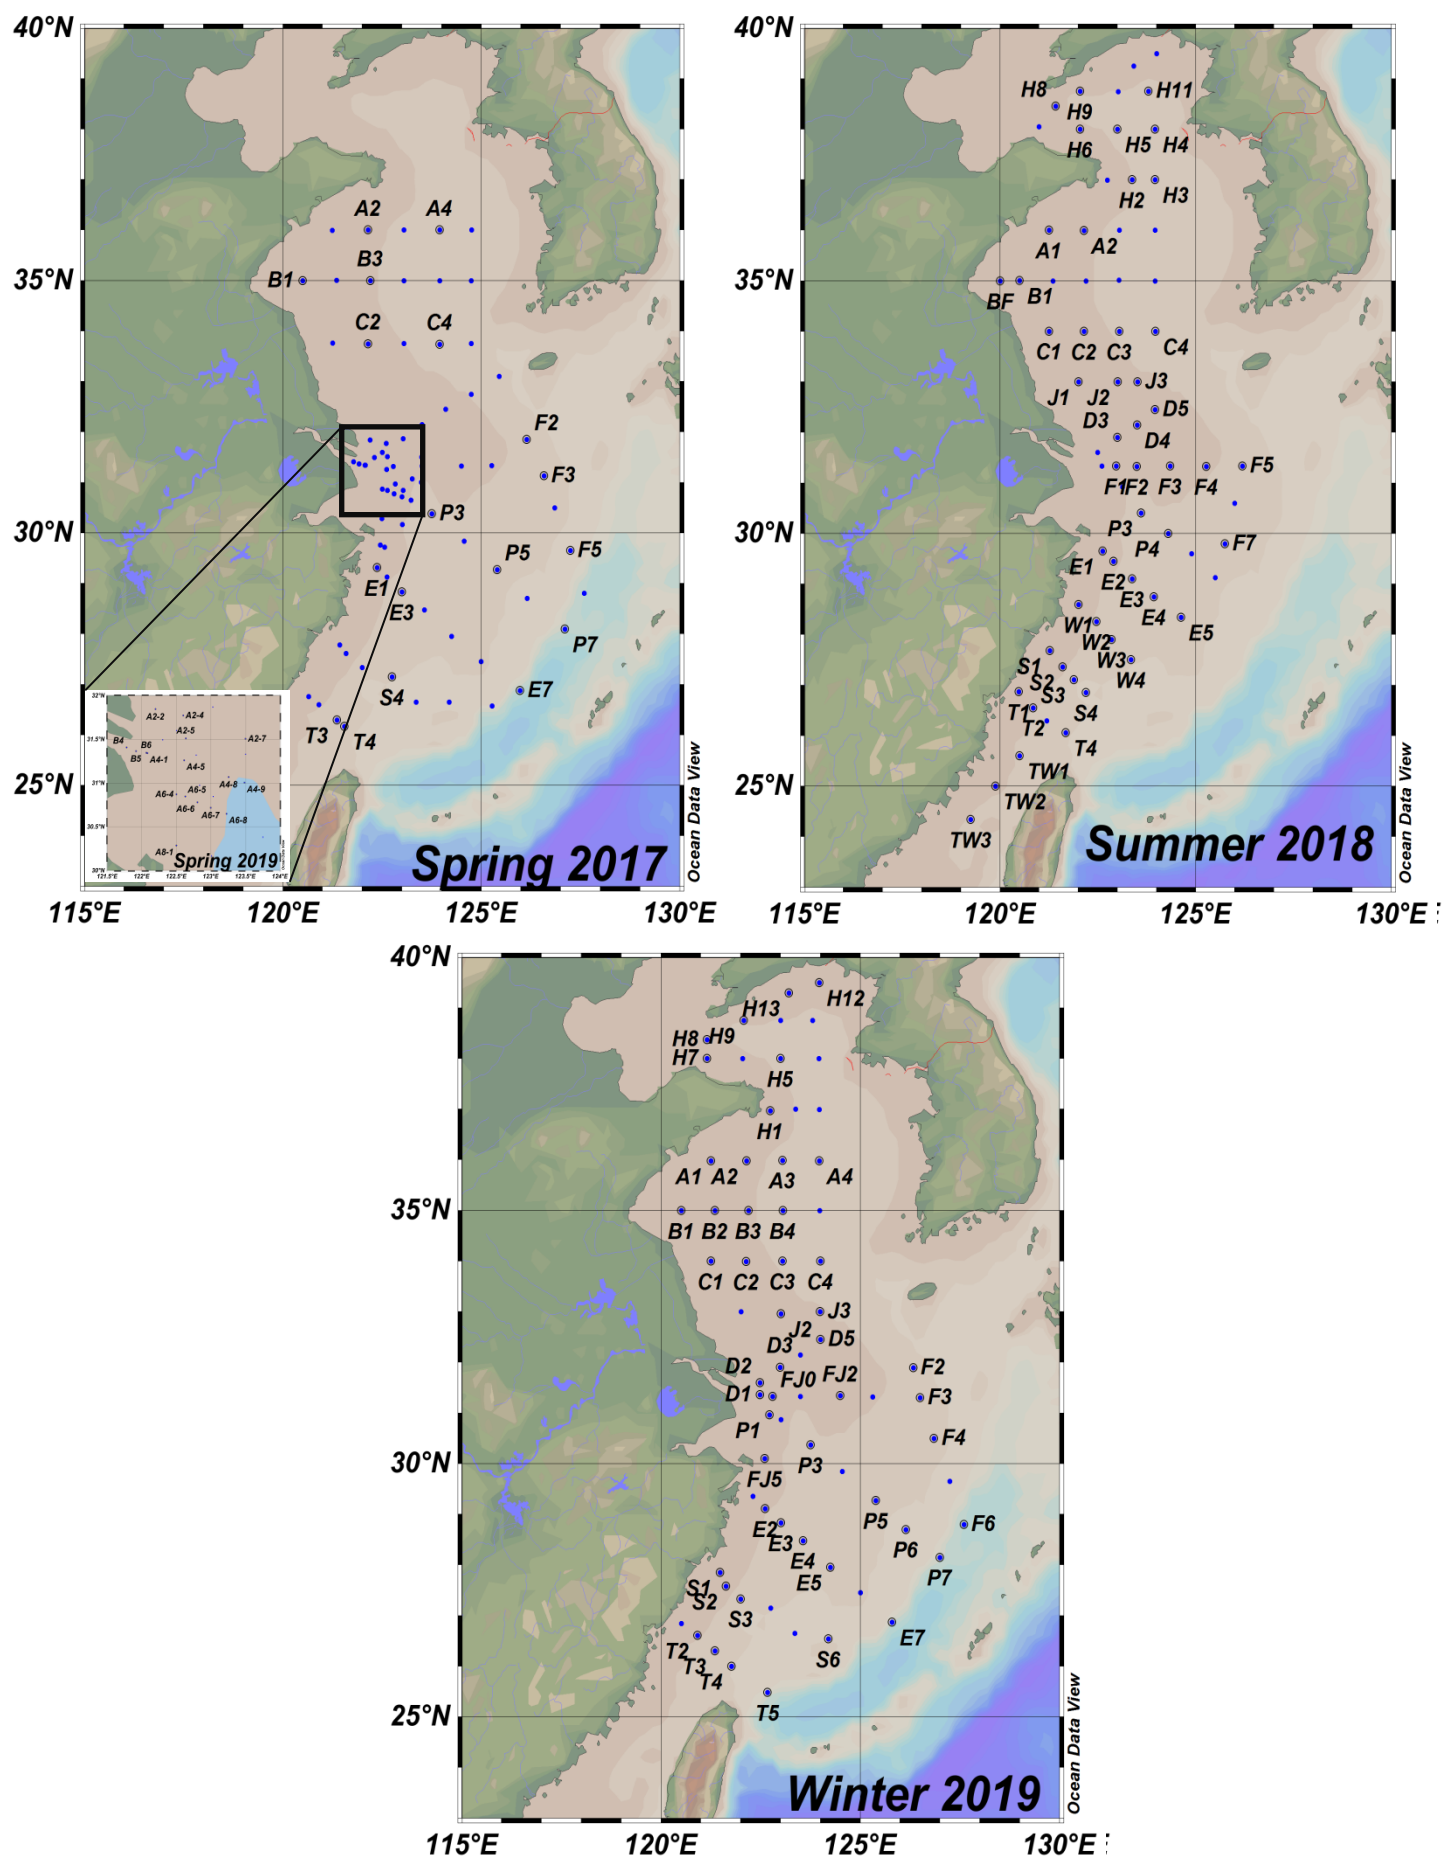

Fig. S1 Map of sampling stations.

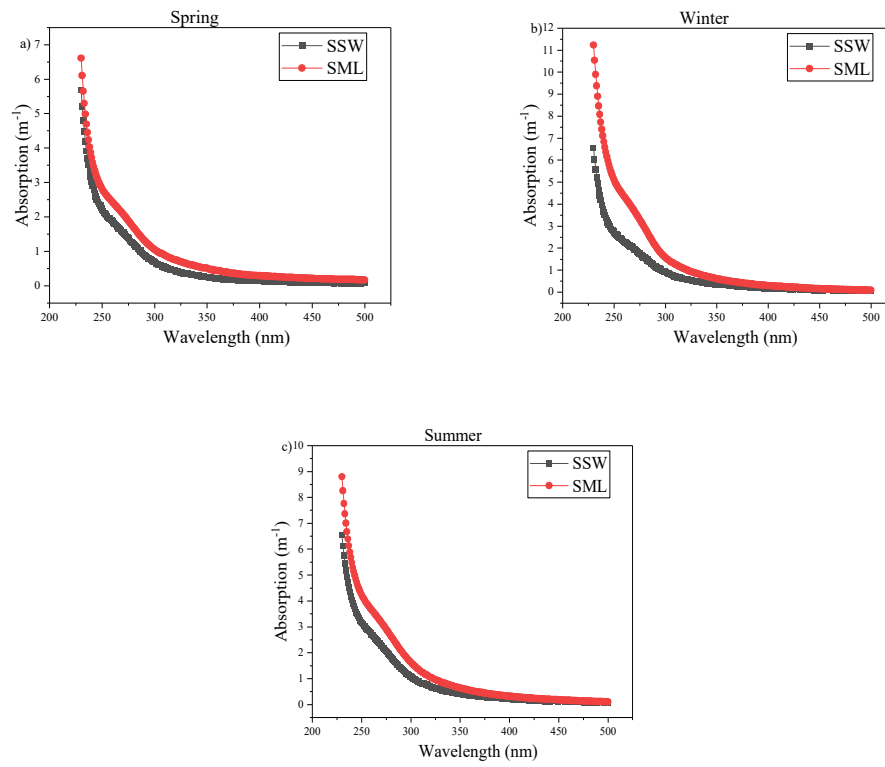

Fig. S1. Absorption spectra averaged by seawater samples between 230 to 500 nm in the SSW and SML during spring (a), winter (b), and summer (d).

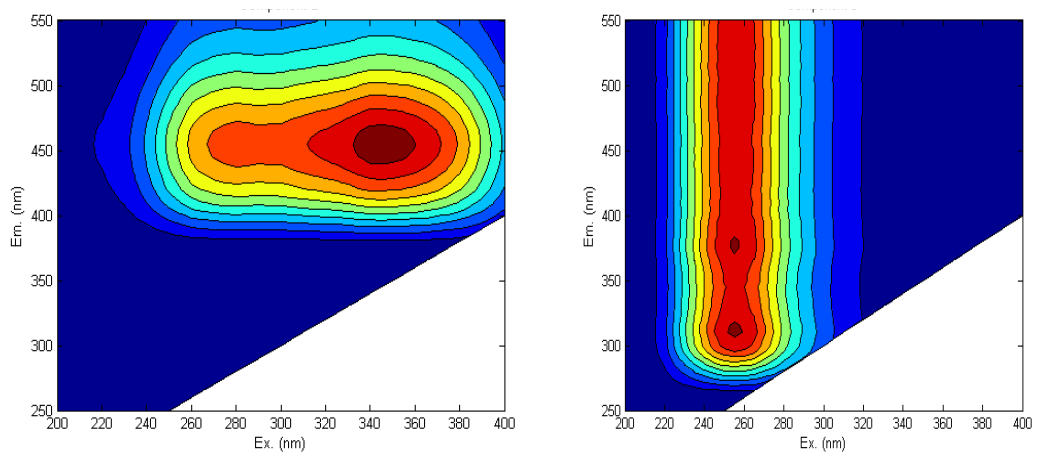



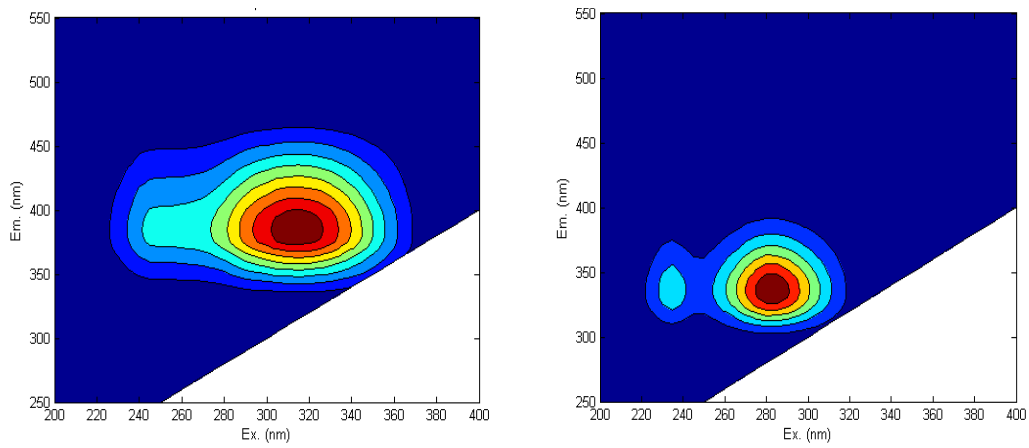

Fig. S2. Representative fluorescence excitation-emission matrix spectra (EEM) contours from samples in the SML and the SSW of the East China Sea (ECS) and the Yellow Sea (YS) during spring, summer, winter, and spring. The fluorescence intensities were quantified using Raman units (RU).

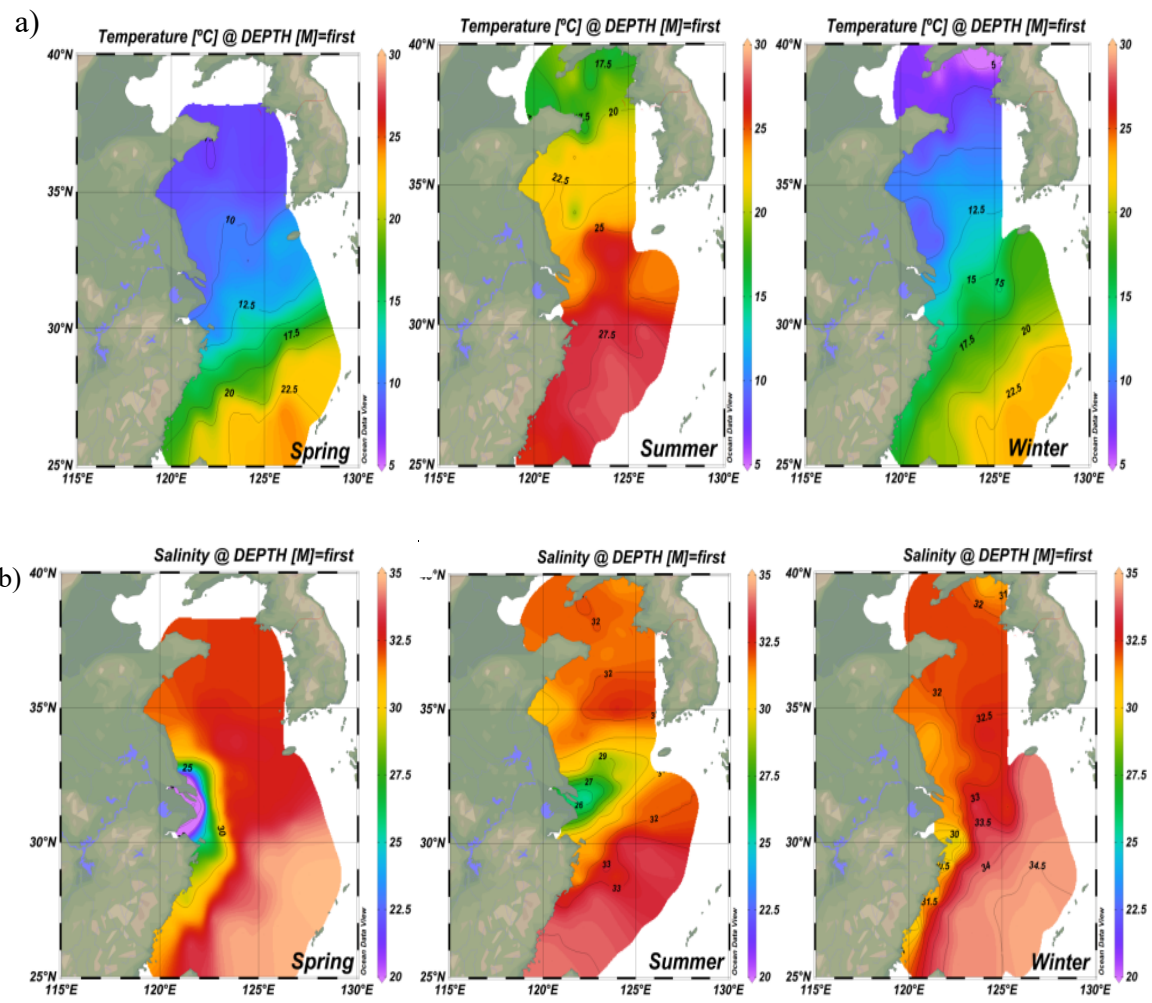

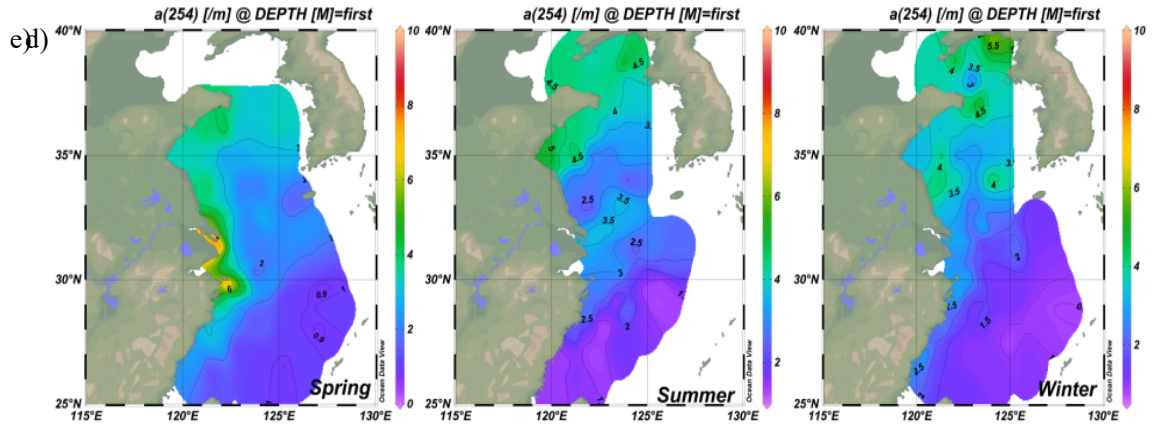

17

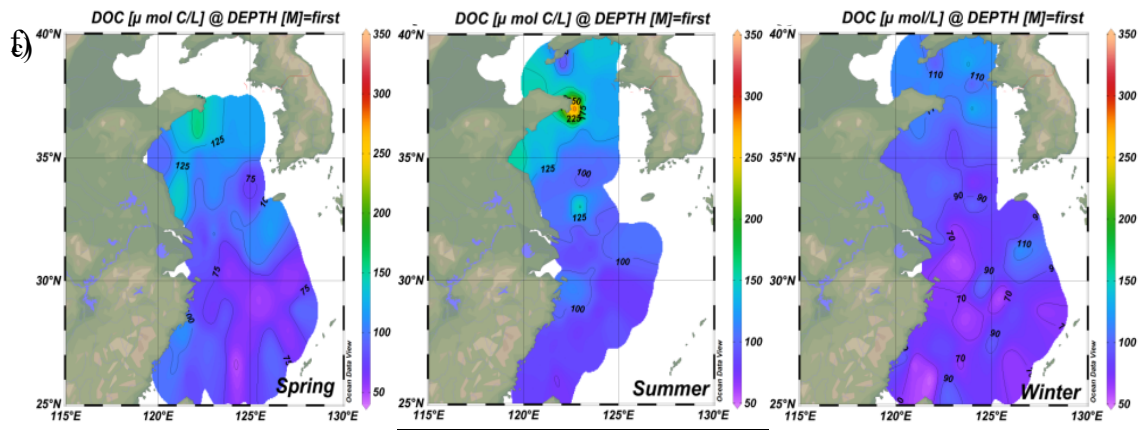

18

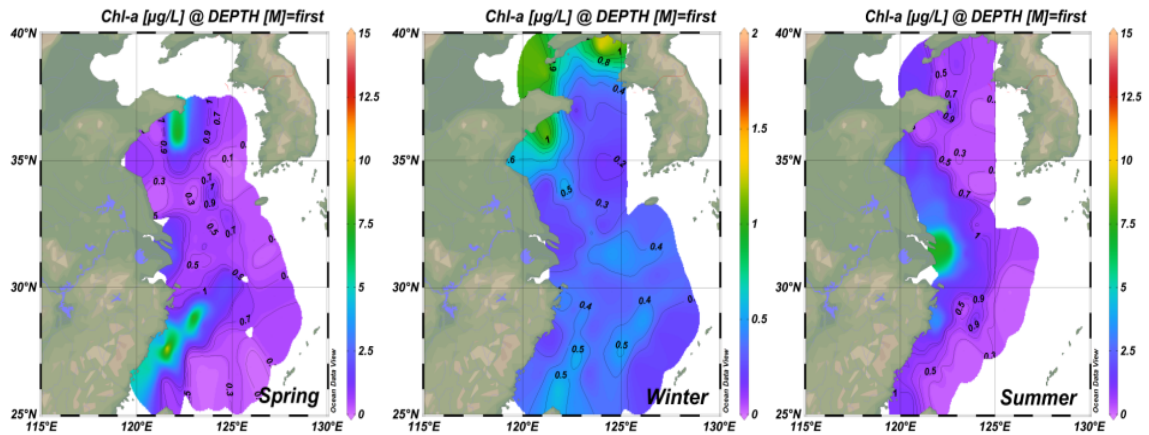

19

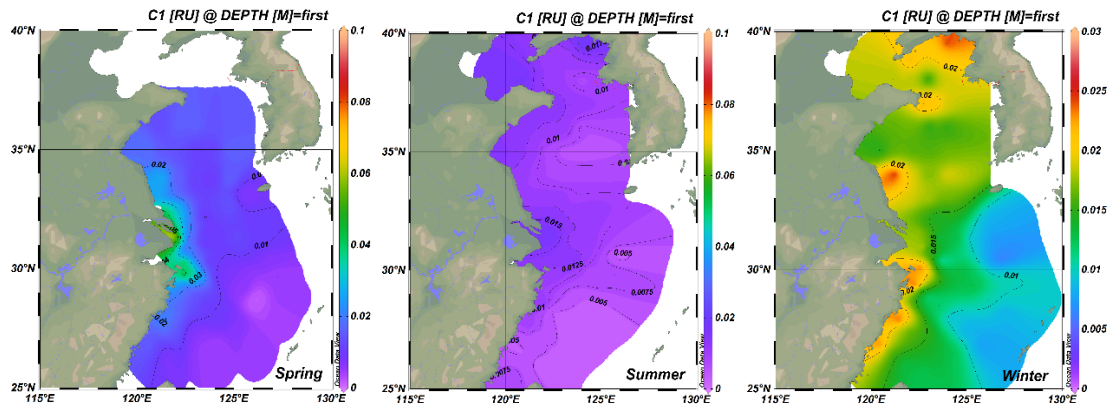

20

g)

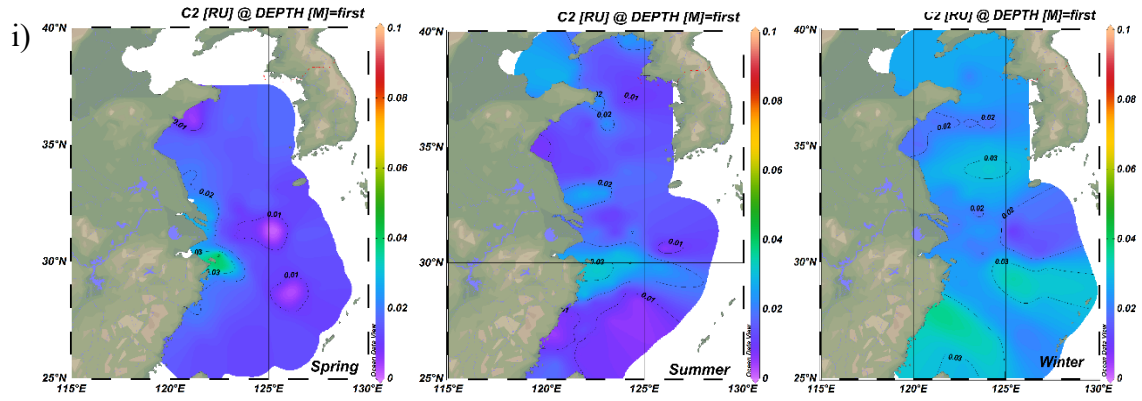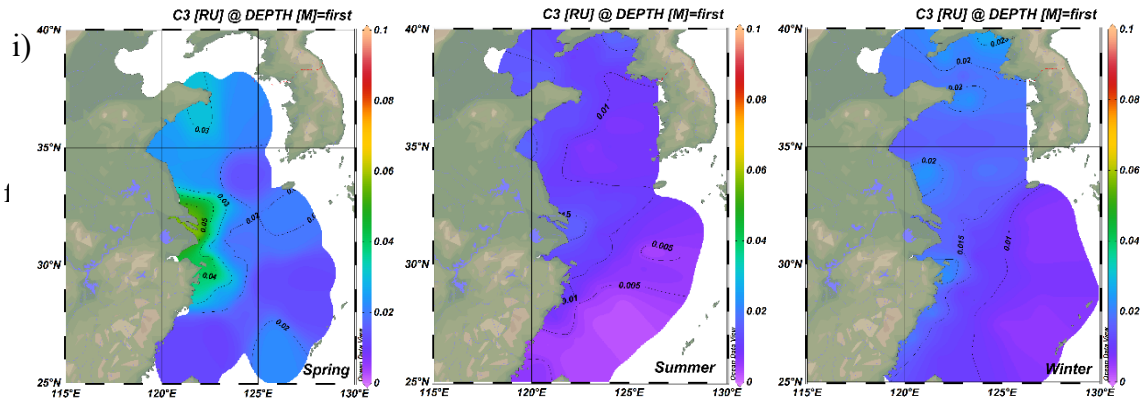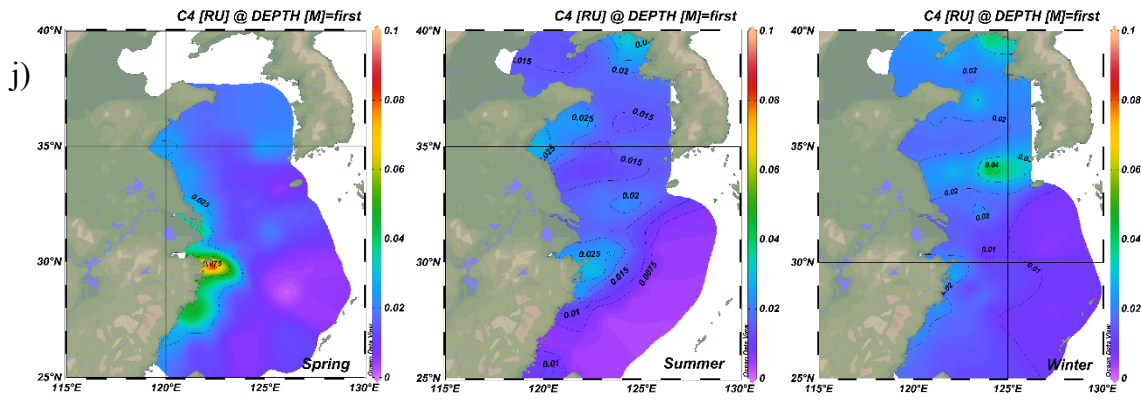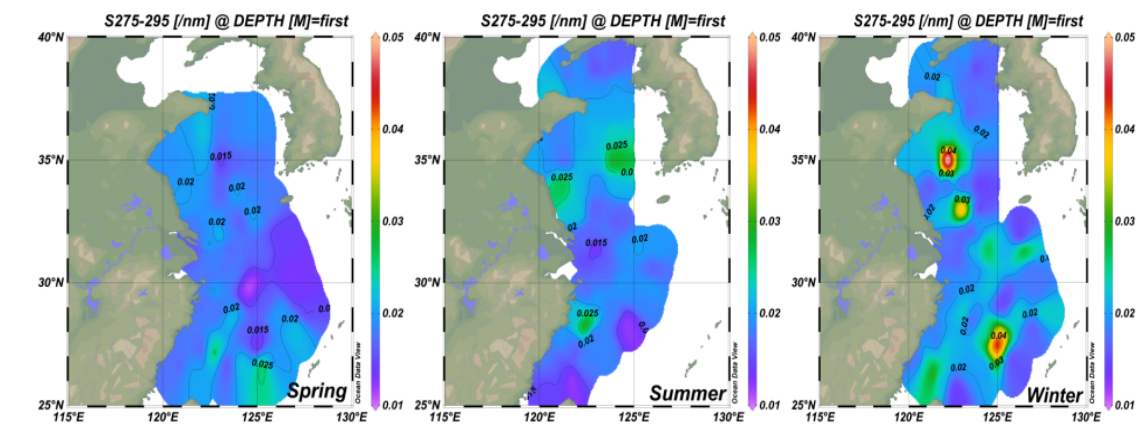



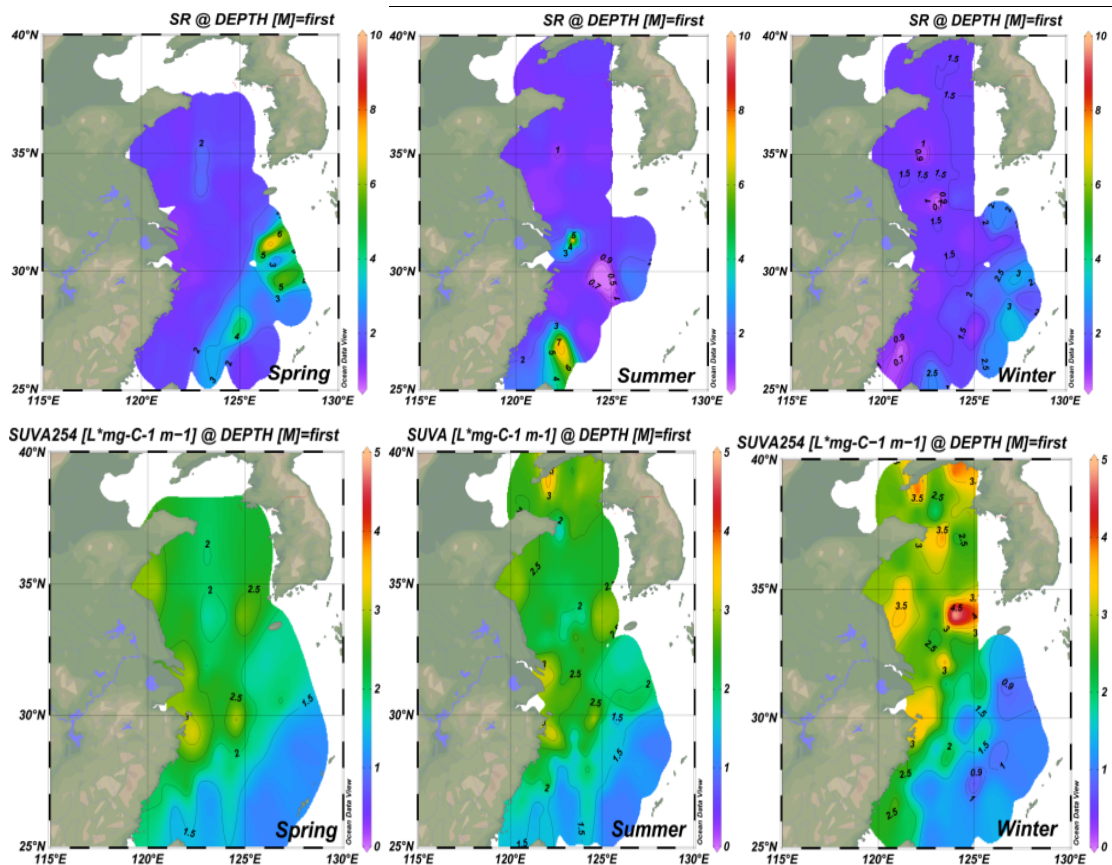

Fig. S3. Distributions of temperature, salinity, CDOM, DOC, Chl-*a*, four fluorescence components,  $S_{275-295}$ ,  $S_R$  and  $SUVA_{254}$  in the subsurface water during spring, summer, and winter. (a) Temperature, (b) Salinity, (c)  $a(254)$ , (d) DOC, (e) Chl-*a*, (f) C1, (g) C2, (h) C3, (i) C4, (j)  $S_{275-295}$ , (k)  $S_R$  and (l)  $SUVA_{254}$ )

k)

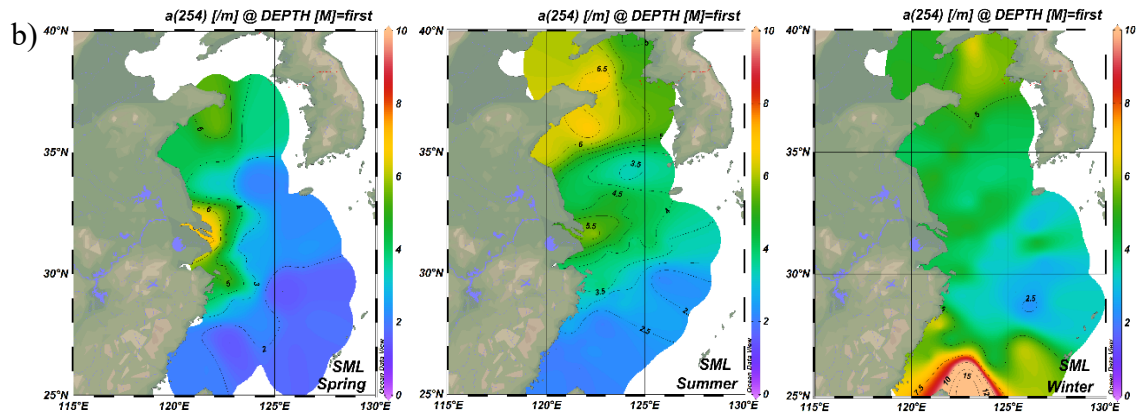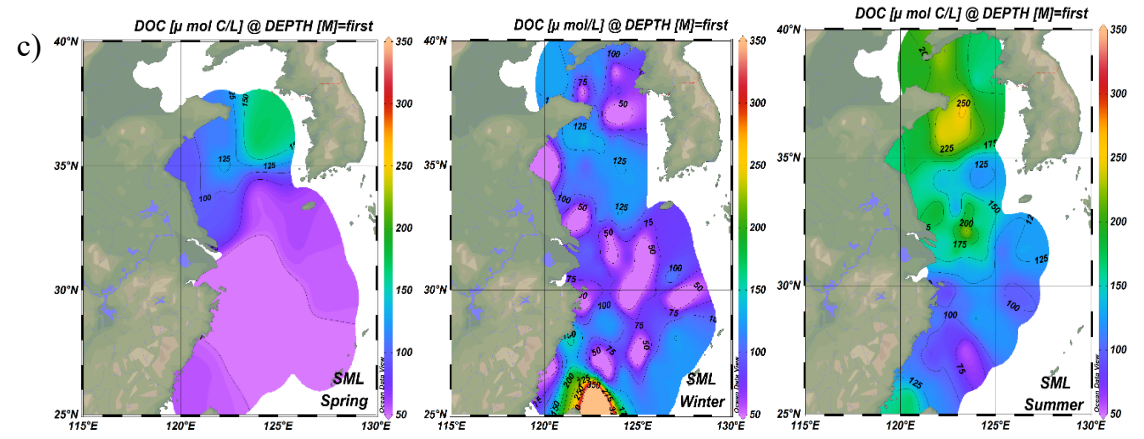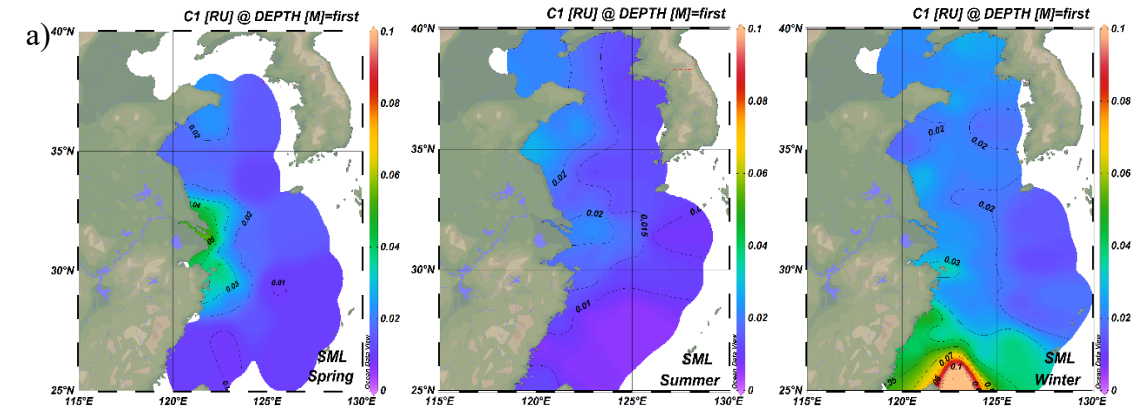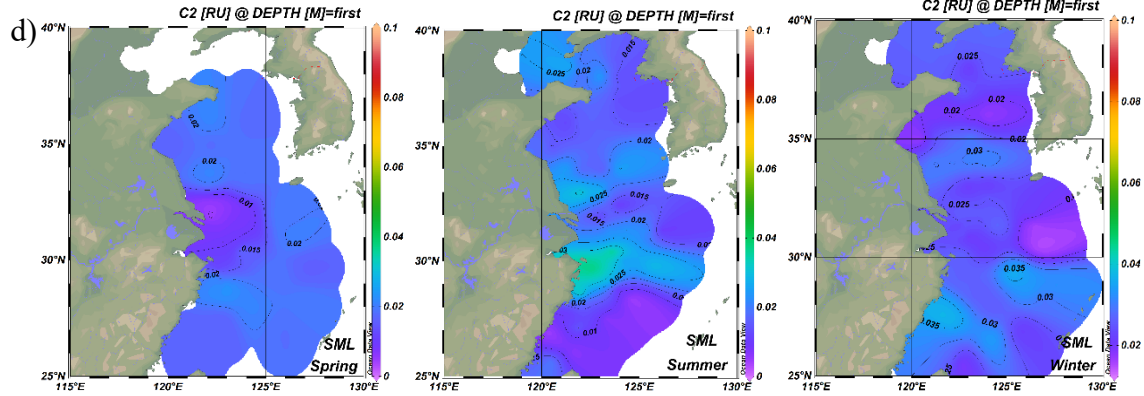

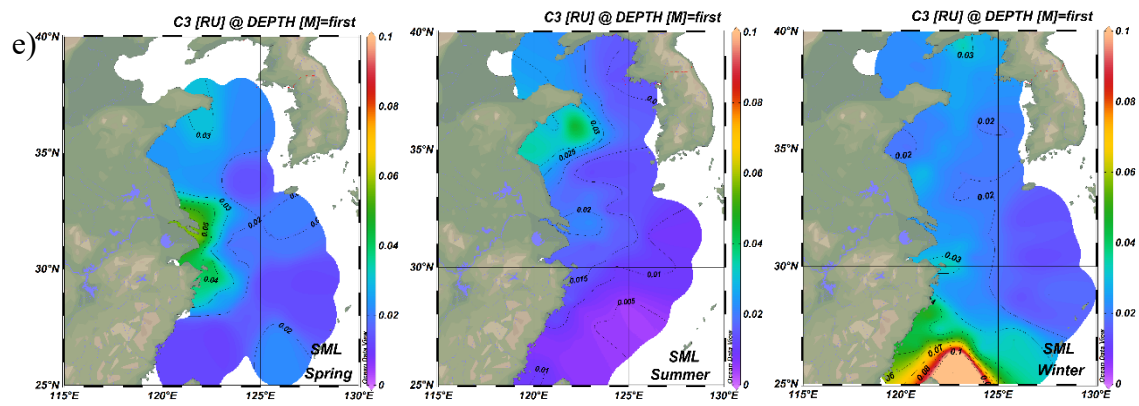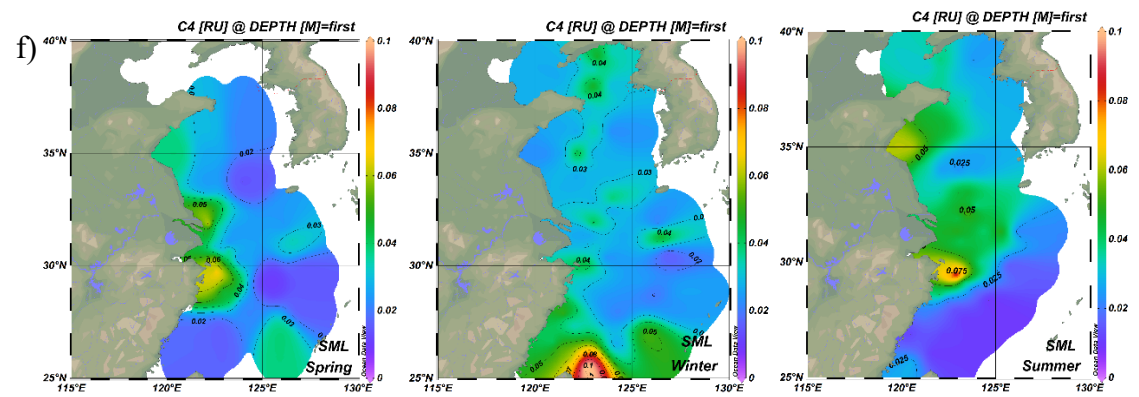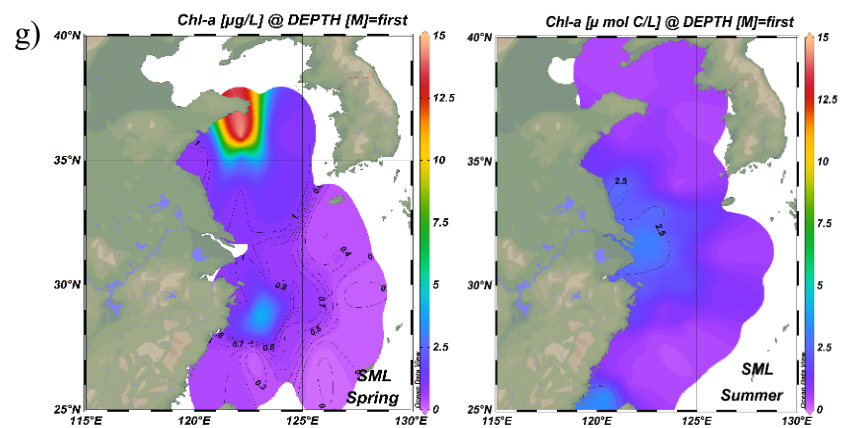

Fig. S4. Distributions of concentrations CDOM, DOC, chl-*a* and four fluorescence components in the



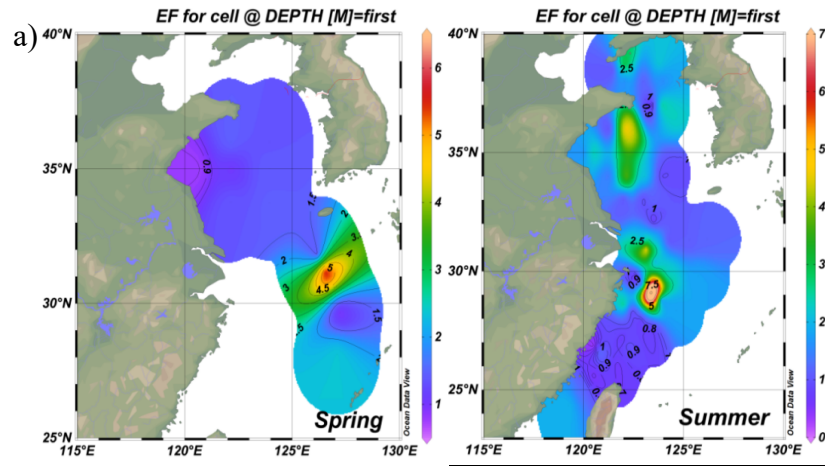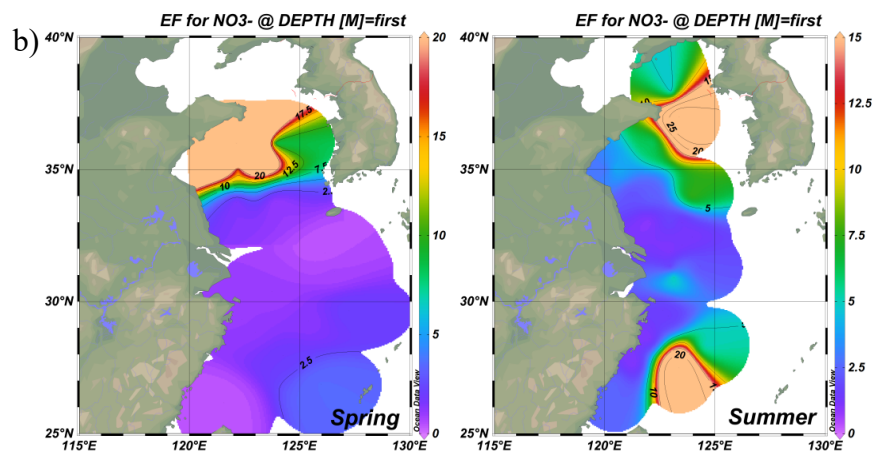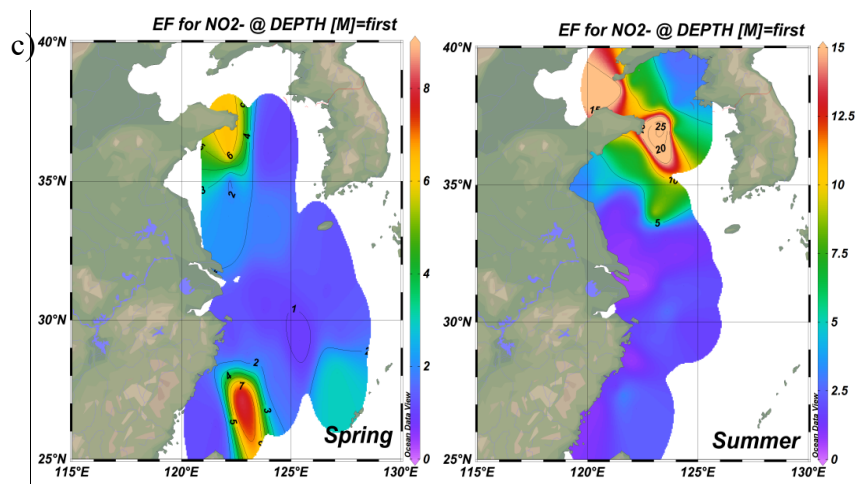

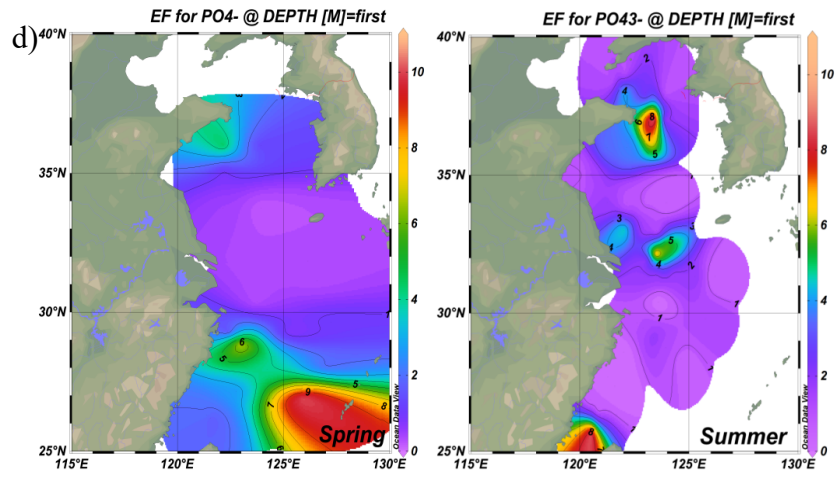

Fig. S5. Distributions of enrichment factors of bacterial abundance and nutrients in the surface microlayer water during spring, summer, and winter.

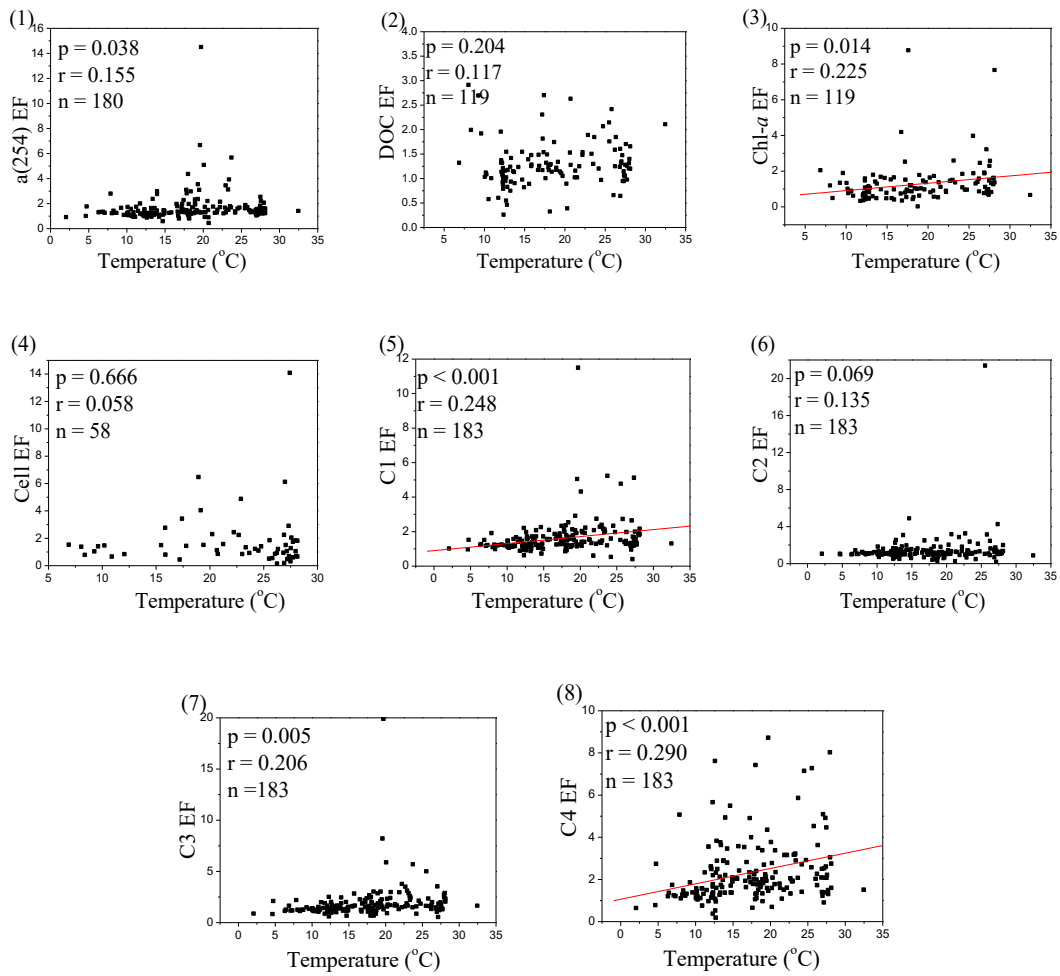

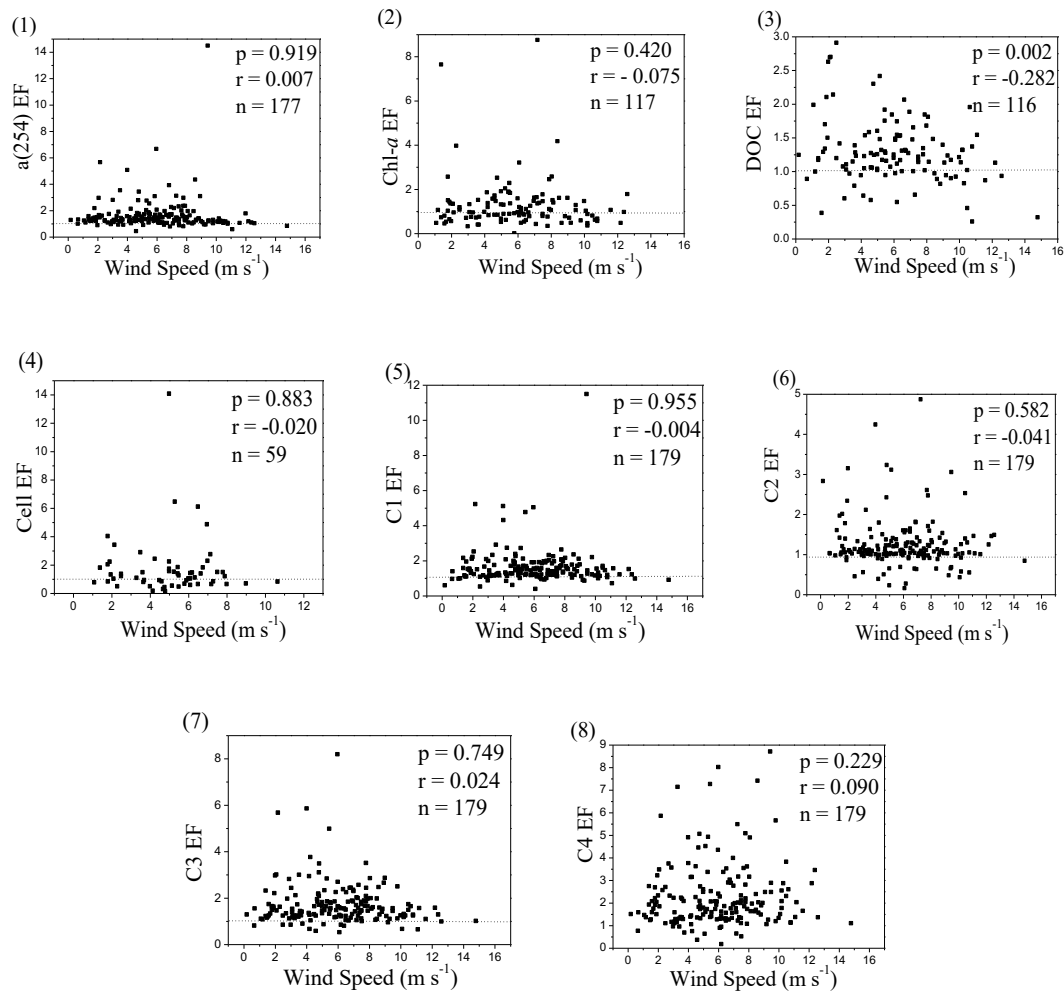

Fig. S6. Relationships between temperature and wind speeds and EFs of a(254), Chl-*a*, DOC, and four fluorescence components.

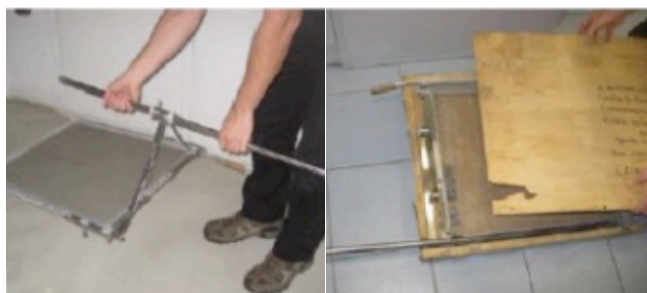

Fig. S7. The Screen Sampler.

58 **Table S1** Correlation coefficients between CDOM optical properties, DOC, salinity, Chl-*a*, DO, and cell  
59 in the SSW in the ECS and the YS during spring, summer, and winter.

60 *Spring*

|                      | a(254)  | DOC    | S <sub>275-295</sub> | S <sub>350-400</sub> | S <sub>R</sub> | C1      | C2      | C3      | C4      | SUVA <sub>254</sub> | Chl- <i>a</i> | DO      | Cell  |
|----------------------|---------|--------|----------------------|----------------------|----------------|---------|---------|---------|---------|---------------------|---------------|---------|-------|
| DOC                  | .679**  |        |                      |                      |                |         |         |         |         |                     |               |         |       |
| S <sub>275-295</sub> | -0.221  | 0.157  |                      |                      |                |         |         |         |         |                     |               |         |       |
| S <sub>350-400</sub> | 0.207   | 0.218  | .808**               |                      |                |         |         |         |         |                     |               |         |       |
| S <sub>R</sub>       | -.315** | -0.258 | -.421**              | -.677**              |                |         |         |         |         |                     |               |         |       |
| C1                   | .883**  | .327*  | -0.092               | .368**               | -.327**        |         |         |         |         |                     |               |         |       |
| C2                   | .615**  | 0.199  | 0.003                | .331**               | -0.195         | .722**  |         |         |         |                     |               |         |       |
| C3                   | .846**  | .375** | -0.071               | .361**               | -.337**        | .980**  | .677**  |         |         |                     |               |         |       |
| C4                   | .813**  | .337*  | -0.166               | 0.215                | -.277*         | .708**  | .678**  | .674**  |         |                     |               |         |       |
| SUVA <sub>254</sub>  | .698**  | -0.032 | -0.13                | 0.214                | -.307*         | .598**  | 0.223   | .573**  | .458**  |                     |               |         |       |
| Chl- <i>a</i>        | 0.177   | 0.163  | -0.045               | 0.054                | -0.134         | 0.159   | 0.125   | 0.16    | 0.201   | 0.182               |               |         |       |
| DO                   | .683**  | .512** | -0.045               | 0.103                | -0.235         | .436**  | .288*   | .433**  | .391**  | .457**              | .556**        |         |       |
| Cell                 | -0.192  | -0.25  | -0.073               | -0.036               | -0.083         | -0.184  | -0.248  | -0.191  | -0.115  | 0.037               | 0.103         | -0.042  |       |
| Salinity             | -.821** | -.327* | 0.158                | -0.235               | .263*          | -.916** | -.538** | -.893** | -.502** | -.691**             | -0.175        | -.433** | 0.133 |

61

62 *Summer*

|                      | a(254) | DOC    | S <sub>275-295</sub> | S <sub>350-400</sub> | S <sub>R</sub> | C1     | C2     | C3     | C4 | SUVA <sub>254</sub> | Chl- <i>a</i> | DO | Cell |
|----------------------|--------|--------|----------------------|----------------------|----------------|--------|--------|--------|----|---------------------|---------------|----|------|
| DOC                  | .661** |        |                      |                      |                |        |        |        |    |                     |               |    |      |
| S <sub>275-295</sub> | 0.075  | 0.14   |                      |                      |                |        |        |        |    |                     |               |    |      |
| S <sub>350-400</sub> | -0.066 | -0.058 | .475**               |                      |                |        |        |        |    |                     |               |    |      |
| S <sub>R</sub>       | -0.213 | -0.148 | -.409**              | -.448**              |                |        |        |        |    |                     |               |    |      |
| C1                   | .571** | .433** | -0.091               | -0.067               | -0.117         |        |        |        |    |                     |               |    |      |
| C2                   | -0.009 | 0.215  | 0.014                | 0.178                | -0.123         | .569** |        |        |    |                     |               |    |      |
| C3                   | .733** | .492** | -0.019               | -0.062               | -0.155         | .941** | .424** |        |    |                     |               |    |      |
| C4                   | .614** | .373** | -0.024               | -0.005               | -0.155         | .678** | .400** | .763** |    |                     |               |    |      |

|                     |         |        |        |        |        |         |        |         |         |         |         |         |       |
|---------------------|---------|--------|--------|--------|--------|---------|--------|---------|---------|---------|---------|---------|-------|
| SUVA <sub>254</sub> | .779**  | 0.13   | -0.007 | -0.026 | -0.177 | .459**  | -0.084 | .597**  | .512**  |         |         |         |       |
| Chl- <i>a</i>       | 0.234   | 0.002  | -0.113 | 0.004  | 0.04   | .525**  | 0.182  | .554**  | 0.234   | .337**  |         |         |       |
| DO                  | .641**  | .551** | 0.118  | 0.009  | -0.222 | 0.238   | -0.058 | .303*   | .297*   | .418**  | -.246*  |         |       |
| Cell                | -.254*  | -.261* | -0.193 | -0.096 | 0.035  | 0.034   | 0.001  | -0.035  | 0.012   | -0.13   | 0.153   | -.343** |       |
| Salinity            | -.505** | -0.166 | 0.158  | 0.109  | 0.069  | -.551** | -0.047 | -.639** | -.377** | -.609** | -.735** | -0.065  | 0.001 |

63

64 *Winter*

|                      | a(254)  | DOC    | S <sub>275-295</sub> | S <sub>350-400</sub> | S <sub>R</sub> | C1      | C2     | C3      | C4      | SUVA <sub>254</sub> | Chl- <i>a</i> | DO      |
|----------------------|---------|--------|----------------------|----------------------|----------------|---------|--------|---------|---------|---------------------|---------------|---------|
| DOC                  | .536**  |        |                      |                      |                |         |        |         |         |                     |               |         |
| S <sub>275-295</sub> | -0.204  | -0.007 |                      |                      |                |         |        |         |         |                     |               |         |
| S <sub>350-400</sub> | .270*   | 0.057  | -0.06                |                      |                |         |        |         |         |                     |               |         |
| S <sub>R</sub>       | -.292*  | -0.15  | .538**               | -.567**              |                |         |        |         |         |                     |               |         |
| C1                   | .750**  | .278*  | -0.179               | .286*                | -.330**        |         |        |         |         |                     |               |         |
| C2                   | -0.084  | -0.075 | 0.027                | 0.041                | -0.02          | .347**  |        |         |         |                     |               |         |
| C3                   | .886**  | .358** | -0.206               | .279*                | -.312**        | .950**  | 0.127  |         |         |                     |               |         |
| C4                   | .777**  | 0.221  | -.260*               | .337**               | -.297*         | .745**  | 0.204  | .822**  |         |                     |               |         |
| SUVA <sub>254</sub>  | .834**  | 0.016  | -0.232               | .317**               | -.258*         | .718**  | -0.093 | .827**  | .795**  |                     |               |         |
| Chl- <i>a</i>        | .333**  | .353** | 0.084                | -.243*               | 0.109          | 0.121   | -0.049 | 0.199   | .252*   | 0.126               |               |         |
| DO                   | .884**  | .581** | -0.092               | 0.119                | -0.139         | .649**  | -0.194 | .779**  | .516**  | .675**              | .380**        |         |
| Salinity             | -.716** | -.254* | 0.099                | -0.224               | .240*          | -.837** | 0.078  | -.852** | -.567** | -.724**             | -0.092        | -.723** |

65

66 \*\* Correlation is significant at the 0.01 level (two-tailed)

67 \* Correlation is significant at the 0.05 level (two-tailed)

68

69

70

71

72

**Table S2** Correlation coefficients between CDOM optical properties, DOC, salinity, Chl-*a*, DO, and nutrients in the SML in the ECS and the YS during spring, summer, and winter.

**Spring**

|                                | a(254)  | DOC     | SUVA <sub>254</sub> | Chl- <i>a</i> | S <sub>275-295</sub> | S <sub>350-400</sub> | S <sub>R</sub> | PO <sub>4</sub> <sup>-</sup> | NO <sub>3</sub> <sup>-</sup> | NO <sub>2</sub> <sup>-</sup> |
|--------------------------------|---------|---------|---------------------|---------------|----------------------|----------------------|----------------|------------------------------|------------------------------|------------------------------|
| DOC                            | 0.706** |         |                     |               |                      |                      |                |                              |                              |                              |
| SUVA <sub>254</sub>            | 0.051   | -0.530* |                     |               |                      |                      |                |                              |                              |                              |
| Chl- <i>a</i>                  | 0.662** | 0.241   | 0.208               |               |                      |                      |                |                              |                              |                              |
| S <sub>275-295</sub>           | -0.19   | -0.325  | 0.251               | 0.063         |                      |                      |                |                              |                              |                              |
| S <sub>350-400</sub>           | -0.036  | -0.19   | 0.233               | 0.144         | 0.938**              |                      |                |                              |                              |                              |
| S <sub>R</sub>                 | -0.33   | -0.205  | -0.02               | -0.251        | -0.465*              | -0.730**             |                |                              |                              |                              |
| PO <sub>4</sub> <sup>-</sup>   | -0.005  | -0.108  | 0.324               | 0.322         | 0.238                | 0.281                | -0.241         |                              |                              |                              |
| NO <sub>3</sub> <sup>-</sup>   | 0.714** | 0.259   | 0.066               | 0.963**       | -0.07                | -0.006               | -0.176         | 0.24                         |                              |                              |
| NO <sub>2</sub> <sup>-</sup>   | 0.232   | 0.068   | -0.129              | .542*         | 0.101                | 0.075                | -0.111         | 0.346                        | 0.976**                      |                              |
| SiO <sub>3</sub> <sup>2-</sup> | -0.269  | -0.125  | -0.126              | -0.149        | -0.303               | -0.252               | 0.071          | 0.229                        | -0.086                       | -0.137                       |

76

**Summer**

|                              | a(254)   | DOC      | SUVA <sub>254</sub> | Chl- <i>a</i> | S <sub>275-295</sub> | S <sub>350-400</sub> | S <sub>R</sub> | PO <sub>4</sub> <sup>-</sup> | NO <sub>3</sub> <sup>-</sup> |
|------------------------------|----------|----------|---------------------|---------------|----------------------|----------------------|----------------|------------------------------|------------------------------|
| DOC                          | 0.756**  |          |                     |               |                      |                      |                |                              |                              |
| SUVA <sub>254</sub>          | -0.537** | -0.746** |                     |               |                      |                      |                |                              |                              |
| Chl- <i>a</i>                | 0.089    | 0.061    | -0.233              |               |                      |                      |                |                              |                              |
| S <sub>275-295</sub>         | 0.17     | 0.102    | -0.336*             | 0.046         |                      |                      |                |                              |                              |
| S <sub>350-400</sub>         | -0.175   | -0.202   | 0.244               | -0.067        | 0.154                |                      |                |                              |                              |
| S <sub>R</sub>               | 0.134    | 0.227    | -0.098              | -0.182        | -0.315*              | -0.708**             |                |                              |                              |
| PO <sub>4</sub> <sup>-</sup> | 0.193    | 0.375**  | -0.232              | 0.242         | -0.096               | -0.084               | 0.024          |                              |                              |
| NO <sub>3</sub> <sup>-</sup> | 0.306*   | 0.097    | -0.104              | 0.579**       | 0.042                | -0.052               | -0.17          | 0.456**                      |                              |
| NO <sub>2</sub> <sup>-</sup> | 0.195    | 0.125    | -0.137              | 0.501**       | 0.063                | -0.075               | -0.115         | 0.647**                      | 0.838**                      |

78

**Winter**

|                      | a(254)  | DOC     | SUVA <sub>254</sub> | S <sub>275-295</sub> | S <sub>350-400</sub> |
|----------------------|---------|---------|---------------------|----------------------|----------------------|
| DOC                  | 0.897** |         |                     |                      |                      |
| SUVA <sub>254</sub>  | 0.14    | -0.272  | 1                   |                      |                      |
| S <sub>275-295</sub> | 0.14    | 0.245   | -0.283*             |                      |                      |
| S <sub>350-400</sub> | -0.26   | -0.298* | 0.17                | -0.778**             |                      |
| S <sub>R</sub>       | 0.044   | 0.216   | -0.417**            | 0.968**              | -0.728**             |

80

81
